# Supplementary material
Source: PubMed Central journal article supplement (PMC6785222)

**Note to readers with disabilities:** *EHP* strives to ensure that all journal content is accessible to all readers. However, some figures and Supplemental Material published in *EHP* articles may not conform to [508 standards](#) due to the complexity of the information being presented. If you need assistance accessing journal content, please contact [ehp508@niehs.nih.gov](mailto:ehp508@niehs.nih.gov). Our staff will work with you to assess and meet your accessibility needs within 3 working days.

### **Supplemental Material**

#### **Endotoxin and (1→3)- $\beta$ -D-Glucan Contamination in Electronic Cigarette Products Sold in the United States**

Mi-Sun Lee, Joseph G. Allen, and David C. Christiani

#### **Table of Contents**

**Table S1.** Coefficient of variation (CV) for endotoxin and glucan (n = 8).

**Table S2.** Endotoxin and glucan levels in EC products by brand, type, and flavor.

**Figure S1.** EC products selection.

**Table S1.** Coefficient of variation (CV) for endotoxin and glucan (n = 8)

| Brand | Flavor  | Type      | Endotoxin <sup>a</sup> |                          |    |       | Glucan <sup>a</sup> |                          |      |       |
|-------|---------|-----------|------------------------|--------------------------|----|-------|---------------------|--------------------------|------|-------|
|       |         |           | Sample (EU/mL)         | Replicate sample (EU/mL) | SD | CV, % | Sample (ng/mL)      | Replicate sample (ng/mL) | SD   | CV, % |
| A     | Others  | Cartridge | <LOD                   | <LOD                     | -  | -     | 5.40                | 5.30                     | 0.07 | 1.32  |
| G     | Menthol | Cartridge | <LOD                   | <LOD                     | -  | -     | 9.73                | 7.40                     | 1.65 | 19.24 |
| H     | Tobacco | Cartridge | <LOD                   | <LOD                     | -  | -     | 2.20                | 2.54                     | 0.24 | 10.14 |
| J     | Tobacco | Cartridge | <LOD                   | <LOD                     | -  | -     | 25.30               | 28.00                    | 1.91 | 7.16  |
| C     | Menthol | E-liquid  | <LOD                   | <LOD                     | -  | -     | 9.73                | 7.40                     | 2.47 | 22.40 |
| C     | Fruit   | E-liquid  | <LOD                   | <LOD                     | -  | -     | 2.20                | 2.54                     | 0.02 | 19.55 |
| F     | Fruit   | E-liquid  | <LOD                   | <LOD                     | -  | -     | 25.30               | 28.00                    | -    | -     |
| J     | Fruit   | E-liquid  | <LOD                   | <LOD                     | -  | -     | 0.88                | 0.90                     | 0.02 | 2.31  |

Each pair of samples was from the same package (or bottle for e-liquid); Endotoxin was measured using an endotoxin-specific kinetic turbidimetric in a *Limulus* amoebocyte lysate (LAL) assay and Glucan was measured using a GlucateLL® Kinetic Assay.

<sup>a</sup> Concentrations < LOD were replaced by LOD/2 when calculating distributions. LODs ranged from 0.1–0.6 EU/mL for endotoxin and from 0.0125–0.2 ng/mL for glucan.

**Table S2.** Endotoxin and glucan levels in EC products by brand, type, and flavor

| Brand | Type      | Flavor  | Nicotine content | Distribution source | Endotoxin (EU/mL)   | Glucan (ng/mL)       |
|-------|-----------|---------|------------------|---------------------|---------------------|----------------------|
| A     | Cartridge | Tobacco | 2.4%             | company website     | 0.326               | 146.5                |
| A     | Cartridge | Menthol | 13-16 mg         | company website     | <0.400 <sup>a</sup> | 38.2                 |
| A     | Cartridge | Others  | 16 mg            | company website     | 1.64                | 1450                 |
| A     | Cartridge | Fruit   | 13-16 mg         | company website     | <0.200 <sup>a</sup> | 3.3                  |
| A     | Cartridge | Others  | 13-16 mg         | company website     | 0.448               | 3.4                  |
| A     | Cartridge | Others  | 13-16 mg         | company website     | <0.800 <sup>a</sup> | 5.4                  |
| A     | Cartridge | Fruit   | 2.4%             | company website     | 0.486               | 3.3                  |
| B     | Cartridge | Tobacco | 2.4%             | company website     | <0.200 <sup>a</sup> | 0.812                |
| B     | Cartridge | Menthol | 2.4%             | company website     | <0.200 <sup>a</sup> | 1.24                 |
| B     | E-liquid  | Tobacco | 2.4%             | company website     | <0.100 <sup>a</sup> | 0.453                |
| B     | E-liquid  | Menthol | 2.4%             | company website     | <0.100 <sup>a</sup> | 0.118                |
| C     | Cartridge | Tobacco | 4.5%             | company website     | <0.800 <sup>a</sup> | 30.8                 |
| C     | Cartridge | Tobacco | 2.4%             | company website     | 0.114               | 36.2                 |
| C     | Cartridge | Menthol | 3.0%             | company website     | 0.118               | 15.5                 |
| C     | Cartridge | Fruit   | 18 mg            | company website     | <0.100 <sup>a</sup> | 1.06                 |
| C     | E-liquid  | Tobacco | 15 mg/mL         | company website     | <0.100 <sup>a</sup> | 25.6                 |
| C     | E-liquid  | Menthol | 15 mg/mL         | company website     | <0.100 <sup>a</sup> | 9.3                  |
| C     | E-liquid  | Fruit   | 15 mg/mL         | company website     | <1.60 <sup>a</sup>  | 0.116                |
| C     | E-liquid  | Fruit   | 15 mg/mL         | company website     | <1.60 <sup>a</sup>  | 0.0802               |
| C     | E-liquid  | Fruit   | 15 mg/mL         | company website     | <1.60 <sup>a</sup>  | 0.115                |
| C     | E-liquid  | Others  | 15 mg/mL         | company website     | 0.58                | 0.143                |
| C     | E-liquid  | Fruit   | 15 mg/mL         | company website     | <0.200 <sup>a</sup> | 0.106                |
| C     | E-liquid  | Fruit   | 15 mg/mL         | company website     | <0.200 <sup>a</sup> | 0.0919               |
| C     | E-liquid  | Fruit   | 15 mg/mL         | company website     | 0.893               | 0.0877               |
| C     | E-liquid  | Others  | 15 mg/mL         | company website     | <0.400 <sup>a</sup> | 0.125                |
| C     | E-liquid  | Tobacco | 15 mg/mL         | company website     | <0.100 <sup>a</sup> | 32.3                 |
| C     | E-liquid  | Menthol | 15 mg/mL         | company website     | <0.100 <sup>a</sup> | 14.1                 |
| C     | E-liquid  | Fruit   | 15 mg/mL         | company website     | <0.100 <sup>a</sup> | 0.396                |
| C     | E-liquid  | Others  | 15 mg/mL         | company website     | <0.100 <sup>a</sup> | 0.452                |
| C     | E-liquid  | Fruit   | 15 mg/mL         | company website     | <0.100 <sup>a</sup> | 0.654                |
| D     | Cartridge | Tobacco | 2.0%             | company website     | <0.100 <sup>a</sup> | 1.36                 |
| D     | Cartridge | Menthol | 2.0%             | company website     | <0.100 <sup>a</sup> | 1.24                 |
| E     | Cartridge | Tobacco | 1.8%             | company website     | 0.737               | 16.4                 |
| E     | Cartridge | Menthol | 1.8%             | company website     | <1.60 <sup>a</sup>  | 19.9                 |
| F     | Cartridge | Tobacco | 2.4%             | company website     | <0.100 <sup>a</sup> | 0.516                |
| F     | Cartridge | Menthol | 2.4%             | company website     | <1.60 <sup>a</sup>  | 0.367                |
| F     | E-liquid  | Tobacco | 1.8%             | company website     | 0.663               | 202.8                |
| F     | E-liquid  | Menthol | 1.8%             | company website     | <0.400 <sup>a</sup> | <0.0125 <sup>a</sup> |
| F     | E-liquid  | Others  | 1.8%             | company website     | <0.100 <sup>a</sup> | <0.0313 <sup>a</sup> |

**Table S2, continued:**

| Brand | Type      | Flavor  | Nicotine content | Distribution source | Endotoxin (EU/mL)   | Glucan (ng/mL)       |
|-------|-----------|---------|------------------|---------------------|---------------------|----------------------|
| F     | E-liquid  | Fruit   | 1.8%             | company website     | 0.363               | <0.0313 <sup>a</sup> |
| F     | E-liquid  | Fruit   | 1.8%             | company website     | <0.100 <sup>a</sup> | <0.0313 <sup>a</sup> |
| G     | Cartridge | Tobacco | 4.8%             | convenience store   | <0.100 <sup>a</sup> | 1.6                  |
| G     | Cartridge | Menthol | 4.8%             | convenience store   | <0.100 <sup>a</sup> | 9.73                 |
| G     | Cartridge | Fruit   | 4.8%             | convenience store   | <0.400 <sup>a</sup> | 7.6                  |
| G     | Cartridge | Others  | 4.8%             | convenience store   | <0.100 <sup>a</sup> | 7.15                 |
| G     | Cartridge | Others  | 4.8%             | convenience store   | <0.100 <sup>a</sup> | 6.12                 |
| G     | Cartridge | Others  | 4.8%             | convenience store   | 0.33                | 6.9                  |
| H     | Cartridge | Tobacco | 24 mg            | company website     | <0.400 <sup>a</sup> | 2.2                  |
| H     | Cartridge | Others  | 24 mg            | company website     | 0.801               | 12.3                 |
| H     | Cartridge | Fruit   | 24 mg            | company website     | 0.828               | 12.4                 |
| H     | Cartridge | Menthol | 24 mg            | company website     | <1.60 <sup>a</sup>  | 5.73                 |
| H     | Cartridge | Fruit   | 18 mg            | company website     | 0.666               | 13.7                 |
| H     | Cartridge | Fruit   | 18 mg            | company website     | 0.646               | 13.6                 |
| I     | Cartridge | Tobacco | 2.4%             | company website     | <0.100 <sup>a</sup> | 0.676                |
| I     | Cartridge | Menthol | 2.4%             | company website     | <0.100 <sup>a</sup> | 0.712                |
| I     | E-liquid  | Tobacco | 2.4%             | company website     | <0.100 <sup>a</sup> | 0.033                |
| I     | E-liquid  | Menthol | 2.4%             | company website     | <0.100 <sup>a</sup> | <0.05 <sup>a</sup>   |
| I     | E-liquid  | Others  | 2.4%             | company website     | <0.100 <sup>a</sup> | 0.128                |
| I     | E-liquid  | Fruit   | 2.4%             | company website     | <1.60 <sup>a</sup>  | 0.029                |
| I     | E-liquid  | Fruit   | 2.4%             | company website     | <0.100 <sup>a</sup> | <0.05 <sup>a</sup>   |
| I     | E-liquid  | Others  | 1.8%             | company website     | <0.100 <sup>a</sup> | <0.200 <sup>a</sup>  |
| I     | E-liquid  | Fruit   | 2.4%             | company website     | <0.400 <sup>a</sup> | <0.025 <sup>a</sup>  |
| I     | E-liquid  | Fruit   | 2.4%             | company website     | <0.100 <sup>a</sup> | 55                   |
| I     | E-liquid  | Fruit   | 1.8%             | company website     | <0.100 <sup>a</sup> | <0.025 <sup>a</sup>  |
| I     | E-liquid  | Fruit   | 2.4%             | company website     | 0.522               | 113.4                |
| I     | E-liquid  | Fruit   | 1.8%             | company website     | <0.100 <sup>a</sup> | 0.875                |
| I     | E-liquid  | Fruit   | 1.8%             | company website     | <0.100 <sup>a</sup> | <0.100 <sup>a</sup>  |
| I     | E-liquid  | Fruit   | 2.4%             | company website     | <0.100 <sup>a</sup> | <0.025 <sup>a</sup>  |
| I     | E-liquid  | Fruit   | 2.4%             | company website     | <0.100 <sup>a</sup> | <0.025 <sup>a</sup>  |
| I     | E-liquid  | Fruit   | 2.4%             | company website     | <0.100 <sup>a</sup> | <0.025 <sup>a</sup>  |
| I     | E-liquid  | Fruit   | 2.4%             | company website     | <0.100 <sup>a</sup> | <0.025 <sup>a</sup>  |
| J     | Cartridge | Tobacco | 2.4%             | company website     | <0.400 <sup>a</sup> | 25.3                 |
| J     | Cartridge | Menthol | 2.4%             | company website     | <0.100 <sup>a</sup> | 19.6                 |
| J     | Cartridge | Others  | 2.4%             | company website     | <0.100 <sup>a</sup> | 16.7                 |
| J     | Cartridge | Others  | 2.4%             | company website     | <0.100 <sup>a</sup> | 23.9                 |

<sup>a</sup> Sample levels below LOD; LODs ranged from 0.1 to 1.6 EU/mL for endotoxin and from 0.0125 to 0.2 ng/mL for glucan.

**Figure S1.** EC products selection

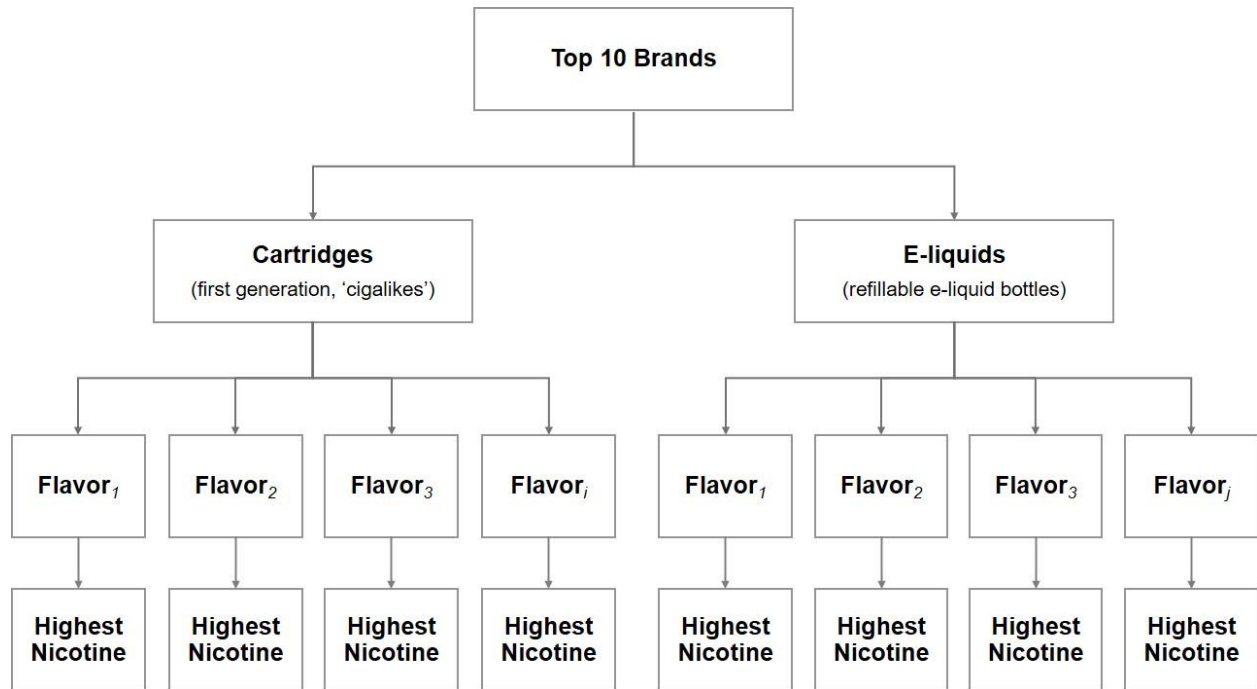

Supplement: ehp3469.s001.acco.pdf [file ehp3469.s001.acco.pdf]
